# Supplementary material
Source: ML conference proceedings conference paper supplement (https://openaccess.thecvf.com/content/CVPR2023/html/Kang_Meta-Learning_With_a_CVPR_2023_paper.html)
Supplement: Supplementary file 1 [file Kang_Meta-Learning_With_a_CVPR_2023_supplemental.pdf]

# Supplementary materials for the paper “Meta-Learning with a Geometry-Adaptive Preconditioner”

## A. Toy example

To build an intuition for the effect of Riemannian metric, we construct a 2-D toy example over the parameter space. A learner minimizes an objective function of the form below.

$$\begin{aligned} f(x_1, x_2) = & x_1^2 + x_2^2 + x_1 x_2 \\ & + \frac{1}{2}(\sin^2 5x_1 + \sin^2 5x_2) \\ & - \frac{1}{2}(\cos^2 3x_1 + \cos^2 3x_2) \end{aligned} \quad (13)$$

We set the initial point to  $(x_1, x_2) = (-4, -2)$  and the learning rate to 0.1. In Figure 2 (a), we train the learner for 50 iterations. In Figure 2 (b), we define a preconditioner  $\mathbf{P}_1$  as follows:

$$\mathbf{P}_1 = \begin{bmatrix} 0.5 & 0.1 \\ 0.1 & -0.3 \end{bmatrix} \quad (14)$$

and train the learner with  $\mathbf{P}_1$  for 13 iterations. In Figure 2 (c), we derive a preconditioner  $\mathbf{P}_2$ , which is the Riemannian metric corresponding to the parameter space (Eq. 13) as follows [32]:

$$\mathbf{P}_2 = \begin{bmatrix} 1 + u^2 & uv \\ uv & 1 + v^2 \end{bmatrix} \quad (15)$$

where  $u = 2x_1 + x_2 + 3\sin(3x_1)\cos(3x_1) + 5\cos(5x_1)\sin(5x_1)$  and  $v = 2x_2 + x_1 + 3\sin(3x_2)\cos(3x_2) + 5\cos(5x_2)\sin(5x_2)$ . We train the learner with  $\mathbf{P}_2$  for 50 iterations.

## B. Proofs of Theorems

**Definition 1.** Two  $n \times n$  matrices  $A$  and  $B$  are similar if there exists an invertible  $n \times n$  matrix  $P$  such that

$$B = P^{-1}AP \quad (16)$$

**Lemma 1.** Let  $A = \text{blkdiag}(A_1, \dots, A_n)$  be a block diagonal matrix such that the main-diagonal blocks  $A_i$  are  $k \times k$  positive definite matrices. Then  $A$  is a positive definite matrix.

*Proof.* First, we show that  $A$  is a positive definite matrix. For all non-zero  $x = (x_1, \dots, x_n) \in \mathbb{R}^{nk}$  where  $x_i \in \mathbb{R}^k$ , we can derive the following.

$$\begin{aligned} x^T A x &= x^T \text{blkdiag}(A_1, \dots, A_n) x \\ &= x_1^T A_1 x_1 + \dots + x_n^T A_n x_n \\ &> 0 \quad (\cdot A_i \text{ is a positive definite}) \end{aligned} \quad (17)$$

Next, we show that  $A$  is a symmetric matrix. Since  $A_i$  is a symmetric matrix (i.e.,  $A_i = A_i^T$ ), we find that the following is satisfied.

$$\begin{aligned} A^T &= \text{blkdiag}(A_1, \dots, A_n)^T \\ &= \text{blkdiag}(A_1^T, \dots, A_n^T) \\ &= \text{blkdiag}(A_1, \dots, A_n) \\ &= A \end{aligned} \quad (18)$$

Hence,  $A$  is a symmetric matrix. Therefore,  $A$  is a positive definite matrix.  $\square$

**Theorem 1.** Let  $\tilde{\mathbf{G}}_{\tau,k}^l \in \mathbb{R}^{m \times n}$  be the ‘ $l$ -layer  $k$ -th inner-step’ gradient matrix transformed by meta parameter  $\mathbf{M}^l$  for task  $\tau$ . Then preconditioner  $\mathbf{P}_{\text{GAP}}$  induced by  $\tilde{\mathbf{G}}_{\tau,k}^l$  is a Riemannian metric and depends on the task-specific parameters  $\theta_{\tau,k}$ .

*Proof.* We can rewrite the  $\tilde{\mathbf{G}}_{\tau,k}^l$  as follows:

$$\begin{aligned} \tilde{\mathbf{G}}_{\tau,k}^l &= \mathbf{U}_{\tau,k}^l (\mathbf{M}^l \cdot \Sigma_{\tau,k}^l) \mathbf{V}_{\tau,k}^{lT} \\ &= (\mathbf{U}_{\tau,k}^l \mathbf{M}^l \mathbf{U}_{\tau,k}^{lT}) \mathbf{U}_{\tau,k}^l \Sigma_{\tau,k}^l \mathbf{V}_{\tau,k}^{lT} \\ &= \mathbf{D}_{\tau,k}^l \mathbf{G}_{\tau,k}^l, \end{aligned} \quad (19)$$

where  $\mathbf{D}_{\tau,k}^l = \mathbf{U}_{\tau,k}^l \mathbf{M}^l \mathbf{U}_{\tau,k}^{lT}$ . To induce preconditioner in Eq. (19), we reformulate Eq. (19) as the general gradient descent form (i.e., matrix-vector product):

$$\begin{aligned} \text{vec}(\tilde{\mathbf{G}}_{\tau,k}^l) &= \text{blkdiag}(\underbrace{\mathbf{D}_{\tau,k}^l, \dots, \mathbf{D}_{\tau,k}^l}_{n \text{ times}}) \cdot \text{vec}(\mathbf{G}_{\tau,k}^l) \\ &= \mathbf{P}_{\text{GAP}} \cdot \text{vec}(\mathbf{G}_{\tau,k}^l) \end{aligned} \quad (20)$$

where  $\mathbf{P}_{\text{GAP}}$  is a block diagonal matrix such that the main-diagonal blocks are  $\mathbf{D}_{\tau,k}^l$ 's. Now, we prove that block  $\mathbf{D}_{\tau,k}^l$  is a positive definite matrix. Since  $\mathbf{D}_{\tau,k}^l$  is similar to  $\mathbf{M}^l$  by Definition 1, they have the same eigenvalues. In addition, all eigenvalues of  $\mathbf{D}_{\tau,k}^l$  are positive because all eigenvalues of  $\mathbf{M}^l$  are positive. Next, we show that  $\mathbf{D}_{\tau,k}^l$  is a symmetric matrix as below.

$$\begin{aligned} (\mathbf{D}_{\tau,k}^l)^T &= (\mathbf{U}_{\tau,k}^l \mathbf{M}^l \mathbf{U}_{\tau,k}^{lT})^T \\ &= \mathbf{U}_{\tau,k}^l \mathbf{M}^l \mathbf{U}_{\tau,k}^{lT} \\ &= \mathbf{D}_{\tau,k}^l \end{aligned} \quad (21)$$

Therefore,  $\mathbf{D}_{\tau,k}^l$  is a positive definite matrix. By Lemma 1,  $\mathbf{P}_{\text{GAP}}$  is a positive definite matrix.

Since the unitary matrix  $\mathbf{U}_{\tau,k}^l$  depends on the gradient matrix  $\tilde{\mathbf{G}}_{\tau,k}^l$ , it depends on the task-wise parameters  $\theta_{\tau,k}$ .

Hence,  $\mathbf{P}_{\text{GAP}}$  depends on the task-wise parameters  $\theta_{\tau,k}$  because it depends on the unitary matrix  $\mathbf{U}_{\tau,k}^l$ .

Since  $\mathbf{P}_{\text{GAP}}$  depends on the task-wise parameters  $\theta_{\tau,k}$ , it can be expressed as a function which is a smooth function mapping from the given  $\theta_{\tau,k}$  to a positive definite matrix  $\text{blkdiag}(\mathbf{D}_{\tau,k}^l, \dots, \mathbf{D}_{\tau,k}^l)$ . Hence,  $\mathbf{P}_{\text{GAP}}$  is a Riemannian metric.

Therefore,  $\mathbf{P}_{\text{GAP}}$  is a Riemannian metric and depends on the task-specific parameters  $\theta_{\tau,k}$ .  $\square$

**Lemma 2.** *If a random vector  $\mathbf{x} = (X_1, \dots, X_n) \in \mathbb{R}^n$  follows an uniform distribution on the  $(n-1)$ -dimensional unit sphere, the variance of the random variable  $X_i$  satisfies the following.*

$$\mathbb{V}(X_i) = \frac{1}{n} \quad (22)$$

*Proof.* Since  $X_1, \dots, X_n$  follow an identical distribution,  $\mathbb{V}(X_i) = \mathbb{V}(X_j)$  holds for all  $i, j$ . Thus,

$$n\mathbb{V}(X_i) = \sum_{i=1}^n \mathbb{V}(X_i). \quad (23)$$

Then, we derive the sum of variance as follows:

$$\begin{aligned} \sum_{i=1}^n \mathbb{V}(X_i) &= \sum_{i=1}^n \mathbb{E}(X_i^2) \quad (\because \mathbb{E}(X) = 0) \\ &= \mathbb{E}\left(\sum_{i=1}^n X_i^2\right) \\ &= \mathbb{E}(\|\mathbf{X}\|_2^2) \\ &= 1. \end{aligned} \quad (24)$$

By Eq. (23) and (24), we have

$$\mathbb{V}(X_i) = \frac{1}{n}. \quad (25)$$

$\square$

**Lemma 3.** *If two independent random vectors  $\mathbf{x} = (X_1, \dots, X_n)$ ,  $\mathbf{y} = (Y_1, \dots, Y_n) \in \mathbb{R}^n$  follow a uniform distribution on the  $(n-1)$ -dimensional unit sphere, then*

$$P(|\langle \mathbf{x}, \mathbf{y} \rangle| > \epsilon) \leq \frac{1}{n\epsilon^2}. \quad (26)$$

*Proof.* Since we can rotate coordinate so that  $\mathbf{y} = (1, 0, \dots, 0) \in \mathbb{R}^n$ , we have

$$\langle \mathbf{x}, \mathbf{y} \rangle = X_1. \quad (27)$$

Following Eq. (27), we show that its expectation is equal to:

$$\begin{aligned} \mathbb{E}[\langle \mathbf{x}, \mathbf{y} \rangle] &= \mathbb{E}[X_1], \\ &= 0 \end{aligned} \quad (28)$$

and its variance is equal to:

$$\begin{aligned} \mathbb{V}[\langle \mathbf{x}, \mathbf{y} \rangle] &= \mathbb{V}[X_1], \\ &= \frac{1}{n} \quad (\text{by Lemma 2}). \end{aligned} \quad (29)$$

By applying Chebyshev's inequality [12] on  $\langle \mathbf{x}, \mathbf{y} \rangle$ , we have

$$P(|\langle \mathbf{x}, \mathbf{y} \rangle| \geq \frac{k}{\sqrt{n}}) \leq \frac{1}{k^2}, \quad (30)$$

for any real number  $k > 0$ . Let  $\frac{k}{\sqrt{n}}$  be a  $\epsilon$ . Then we rewrite the in Eq. (30) as follows:

$$P(|\langle \mathbf{x}, \mathbf{y} \rangle| \geq \epsilon) \leq \frac{1}{n\epsilon^2}. \quad (31)$$

This result indicates that the two vectors  $\mathbf{x}$  and  $\mathbf{y}$  become asymptotically orthogonal as  $n$  increases.  $\square$

**Assumption 2.** *The elements of gradient matrix follows an i.i.d. normal distribution with zero mean.*

**Theorem 2.** *Let  $\mathbf{G} \in \mathbb{R}^{m \times n}$  be a gradient matrix and  $\tilde{\mathbf{G}}$  be the gradient matrix transformed by meta parameter  $\mathbf{M}$ . Under the Assumption 2, as  $n$  becomes large,  $\tilde{\mathbf{G}}$  asymptotically becomes equivalent to  $\mathbf{M}\mathbf{G}$  as follows:*

$$\tilde{\mathbf{G}} \cong \mathbf{M}\mathbf{G} \quad (32)$$

*Proof.* Let  $\mathbf{g}_1, \mathbf{g}_2, \dots, \mathbf{g}_m$  are the row vectors of  $\mathbf{G}$ . Then,

$$\mathbf{G} = \begin{bmatrix} \|\mathbf{g}_1\| & & \\ & \ddots & \\ & & \|\mathbf{g}_m\| \end{bmatrix} \begin{bmatrix} \frac{\mathbf{g}_1}{\|\mathbf{g}_1\|} \\ \vdots \\ \frac{\mathbf{g}_m}{\|\mathbf{g}_m\|} \end{bmatrix}. \quad (33)$$

Under the Assumption 2,  $\mathbf{g}_1, \mathbf{g}_2, \dots, \mathbf{g}_m$  follow an i.i.d multivariate normal distribution. Then, we have

$$\frac{\mathbf{g}_i}{\|\mathbf{g}_i\|} \perp \frac{\mathbf{g}_j}{\|\mathbf{g}_j\|} \quad (\forall i \neq j), \quad (34)$$

and  $\frac{\mathbf{g}_i}{\|\mathbf{g}_i\|}, \frac{\mathbf{g}_j}{\|\mathbf{g}_j\|}$  are located on the  $(n-1)$ -dimensional unit sphere [41]. Since independent vectors  $\frac{\mathbf{g}_i}{\|\mathbf{g}_i\|}, \frac{\mathbf{g}_j}{\|\mathbf{g}_j\|}$  are located on the  $(n-1)$ -dimensional unit sphere, the vectors are asymptotically orthogonal as  $n$  increases by Lemma 2. Now, we rewrite  $\mathbf{G}$  as follows.

$$\mathbf{G} = \mathbf{I} \begin{bmatrix} \|\mathbf{g}_1\| & & \\ & \ddots & \\ & & \|\mathbf{g}_m\| \end{bmatrix} \begin{bmatrix} \frac{\mathbf{g}_1}{\|\mathbf{g}_1\|} \\ \vdots \\ \frac{\mathbf{g}_m}{\|\mathbf{g}_m\|} \end{bmatrix} \quad (35)$$

Since  $\mathbf{I}$  is a unitary matrix and  $(\frac{\mathbf{g}_1}{\|\mathbf{g}_1\|}, \dots, \frac{\mathbf{g}_m}{\|\mathbf{g}_m\|})^T$  approximately becomes semi-unitary matrices as  $n$  increases, the singular values of  $\mathbf{G}$  asymptotically become  $\|\mathbf{g}_1\|, \dots, \|\mathbf{g}_m\|$ .

By Eq. (35), the following holds under the Assumption 2 as  $n$  becomes sufficiently large.

$$\tilde{\mathbf{G}} \cong \mathbf{M}\mathbf{G} \quad (36)$$

$\square$

## C. Implementation Details

For the reproducibility, we provide the details of implementation. Our implementations are based on Torchmeta [15] library. Our implementation code is available at: <https://github.com/Suhyun777/CVPR23-GAP>.

### C.1. Hyper-parameters

For all the experiments, we use the hyper-parameters in Table 9.

| Hyper-parameter                    | Sinusoid |         |         | mini-ImageNet |        | tiered-ImageNet |        | Cross-domain |        |
|------------------------------------|----------|---------|---------|---------------|--------|-----------------|--------|--------------|--------|
|                                    | 5 shot   | 10 shot | 20 shot | 1 shot        | 5 shot | 1 shot          | 5 shot | 1 shot       | 5 shot |
| Batch size                         | 4        | 4       | 4       | 4             | 2      | 4               | 2      | 4            | 2      |
| Total training iteration           | 70000    | 70000   | 70000   | 80000         | 80000  | 130000          | 200000 | 80000        | 80000  |
| inner learning rate $\alpha$       | 0.01     | 0.01    | 0.01    | 0.01          | 0.01   | 0.01            | 0.01   | 0.01         | 0.01   |
| outer learning rate $\beta_1$      | 0.001    | 0.001   | 0.001   | 0.0001        | 0.0001 | 0.0001          | 0.0001 | 0.0001       | 0.0001 |
| outer learning rate $\beta_2$      | 0.001    | 0.001   | 0.0001  | 0.003         | 0.0001 | 0.003           | 0.0001 | 0.003        | 0.0001 |
| The number of training inner steps | 5        | 5       | 5       | 5             | 5      | 5               | 5      | 5            | 5      |
| The number of testing inner steps  | 10       | 10      | 10      | 10            | 10     | 10              | 10     | 10           | 10     |
| Data augmentation                  |          | None    |         | random flip   |        | random flip     |        | random flip  |        |

Table 9. Hyper-parameters used for training GAP on various few-shot learning experiments.

### C.2. Backbone Architecture

#### C.2.1 2-layer MLP network.

For the few-shot regression experiment, we use a simple Multi-Layer Perceptron (MLP) with 1-dimensional input/output and 40-dimensional hidden layers as in [20].

#### C.2.2 4-Conv network.

For the few-shot classification and cross-domain few-shot classification experiments, we use the standard Conv-4 backbone used in [56], comprising 4 modules with  $3 \times 3$  convolutions, with 128 filters followed by batch normalization [26], ReLU non-linearity, and  $2 \times 2$  max-pooling.

### C.3. Optimization

We use ADAM optimizer [28]. For tiered-ImageNet experiment, the learning rate (LR) is scheduled by the cosine learning rate decay [38] for every 500 iterations. In all the experiments except for the tiered-ImageNet, the learning rate is unscheduled.

### C.4. Preconditioning

In the few-shot regression experiment, we apply preconditioner only to the hidden layer. In both few-shot classification and cross-domain few-shot classification, we only apply preconditioner to 4 convolutional layers.
